# Supplementary material
Source: PubMed Central journal article supplement (PMC3840404)

| <b>Supplemental Table 1: Univariate analyses of risk factors for overall mortality and pulmonary death by day 90 after RSV LRD (N = 118)</b> |                          |                |                        |                |
|----------------------------------------------------------------------------------------------------------------------------------------------|--------------------------|----------------|------------------------|----------------|
| <b>Covariates</b>                                                                                                                            | <b>Overall mortality</b> |                | <b>Pulmonary death</b> |                |
|                                                                                                                                              | <b>HR 95% C.I.</b>       | <b>p-value</b> | <b>HR 95% C.I.</b>     | <b>p-value</b> |
| <b>Transplant year</b>                                                                                                                       |                          |                |                        |                |
| 1989-1997                                                                                                                                    | 1.00                     |                | 1.00                   |                |
| 1998-2010                                                                                                                                    | 0.48 (0.27-0.84)         | 0.011          | 0.42 (0.21-0.84)       | 0.015          |
| <b>Transplant year as continuous covariate</b>                                                                                               | 0.94 (0.89-0.98)         | 0.008          | 0.92 (0.86-0.97)       | 0.005          |
| <b>Age at transplant as continuous covariate</b>                                                                                             | 1.02 (1.00-1.03)         | 0.073          | 1.01 (0.99-1.03)       | 0.207          |
| <b>Cell source:</b>                                                                                                                          |                          |                |                        |                |
| PBSC                                                                                                                                         | 1.00                     |                | 1.00                   |                |
| BM/CB                                                                                                                                        | 2.88 (1.57-5.29)         | <.001          | 2.80 (1.37-5.75)       | 0.005          |
| <b>Donor type</b>                                                                                                                            |                          |                |                        |                |
| Autologous                                                                                                                                   | 1.00                     |                | 1.00                   |                |
| Allogeneic                                                                                                                                   | 1.53 (0.69-3.39)         | 0.291          | 2.04 (0.77-5.40)       | 0.149          |
| <b>Conditioning regimen</b>                                                                                                                  |                          |                |                        |                |
| MA + TBI (≥12Gy)                                                                                                                             | 1.00                     |                | 1.00                   |                |
| MA +/- low TBI                                                                                                                               | 1.04 (0.60-1.81)         | 0.89           | 0.87 (0.44-1.69)       | 0.676          |
| Non-myeloablative                                                                                                                            | 0.44 (0.17-1.13)         | 0.088          | 0.47 (0.16-1.35)       | 0.161          |
| <b>WBC count, 10<sup>6</sup>/L</b>                                                                                                           |                          |                |                        |                |
| >1000                                                                                                                                        | 1.00                     |                | 1.00                   |                |
| ≤1000                                                                                                                                        | 2.07 (1.22-3.49)         | 0.007          | 1.98 (1.06-3.69)       | 0.031          |
| <b>Lymphocyte count, 10<sup>6</sup>/L</b>                                                                                                    |                          |                |                        |                |
| ≥100                                                                                                                                         | 1.00                     |                | 1.00                   |                |
| <100                                                                                                                                         | 1.48 (0.86-2.56)         | 0.161          | 1.42 (0.74-2.72)       | 0.291          |
| <b>Neutrophil count, 10<sup>6</sup>/L</b>                                                                                                    |                          |                |                        |                |
| ≥100                                                                                                                                         | 1.00                     |                | 1.00                   |                |
| <100                                                                                                                                         | 1.58 (0.88-2.82)         | 0.124          | 1.49 (0.74-2.98)       | 0.262          |
| <b>Monocyte count, 10<sup>6</sup>/L</b>                                                                                                      |                          |                |                        |                |
| ≥100                                                                                                                                         | 1.00                     |                | 1.00                   |                |
| <100                                                                                                                                         | 2.33 (1.29-4.20)         | 0.005          | 2.45 (1.22-4.90)       | 0.012          |
| <b>Platelet count, 10<sup>6</sup>/L</b>                                                                                                      |                          |                |                        |                |
| ≥10000                                                                                                                                       | 1.00                     |                | 1.00                   |                |
| <10000                                                                                                                                       | 1.97 (1.16-3.34)         | 0.012          | 1.96 (1.05-3.67)       | 0.034          |
| <b>Day of RSV LTD following HCT</b>                                                                                                          |                          |                |                        |                |
| ≥30                                                                                                                                          | 1.00                     |                | 1.00                   |                |
| <30                                                                                                                                          | 1.49 (0.88-2.52)         | 0.137          | 1.59 (0.85-2.95)       | 0.144          |
| <b>Copathogen</b>                                                                                                                            |                          |                |                        |                |
| None                                                                                                                                         | 1.00                     |                | 1.00                   |                |
| Any copathogen                                                                                                                               | 1.96 (1.16-3.32)         | 0.012          | 1.49 (0.80-2.78)       | 0.209          |
| <b>Oxygen at diagnosis of LRD</b>                                                                                                            |                          |                |                        |                |
| None/≤2L                                                                                                                                     | 1.00                     |                | 1.00                   |                |
| >2L/Ventilator                                                                                                                               | 2.27 (1.34-3.86)         | 0.002          | 2.97 (1.56-5.64)       | <.001          |
| <b>Mechanical ventilation as time-</b>                                                                                                       | 5.08 (2.98-8.66)         | <.001          | 6.82 (3.62-12.8)       | <.001          |

|                                                                                                                                                                     |                  |       |                  |       |
|---------------------------------------------------------------------------------------------------------------------------------------------------------------------|------------------|-------|------------------|-------|
| <b>dependent</b>                                                                                                                                                    |                  |       |                  |       |
| <b>Steroid use at diagnosis of LRD</b>                                                                                                                              |                  |       |                  |       |
| ≤2 mg/kg                                                                                                                                                            | 1.00             |       | 1.00             |       |
| >2 mg/kg                                                                                                                                                            | 3.25 (1.66-6.33) | <.001 | 3.63 (1.71-7.70) | <.001 |
| <b>Steroid use &gt;2mg/kg as time-dependent</b>                                                                                                                     | 3.98 (1.98-8.00) | <.001 | 4.24 (1.93-9.34) | <.001 |
| <b>Palivizumab Treatment</b>                                                                                                                                        |                  |       |                  |       |
| No                                                                                                                                                                  | 1.00             |       | 1.00             |       |
| Yes                                                                                                                                                                 | 0.59 (0.33-1.05) | 0.075 | 0.43 (0.21-0.91) | 0.027 |
| <b>Preemptive ribavirin prior to LRD</b>                                                                                                                            |                  |       |                  |       |
| None                                                                                                                                                                | 1.00             |       | 1.00             |       |
| <5 days                                                                                                                                                             | 0.58 (0.21-1.60) | 0.292 | 0.20 (0.03-1.43) | 0.109 |
| ≥5 days                                                                                                                                                             | 0.38 (0.14-1.05) | 0.061 | 0.39 (0.12-1.25) | 0.113 |
| <b>Ribavirin treatment for LRD</b>                                                                                                                                  |                  |       |                  |       |
| None                                                                                                                                                                | 1.00             |       | 1.00             |       |
| Systemic                                                                                                                                                            | 0.53 (0.22-1.28) | 0.16  | 0.40 (0.14-1.14) | 0.087 |
| Aerosolized                                                                                                                                                         | 0.27 (0.14-0.51) | <.001 | 0.22 (0.11-0.46) | <.001 |
| <b>Ribavirin treatment as time-dependent</b>                                                                                                                        | 0.35 (0.18-0.66) | 0.001 | 0.29 (0.14-0.59) | <.001 |
| <b>FEV/FVC % prior to RSV</b>                                                                                                                                       |                  |       |                  |       |
| ≥70                                                                                                                                                                 | 1.00             |       | 1.00             |       |
| <70                                                                                                                                                                 | 0.55 (0.25-1.21) | 0.135 | 0.44 (0.15-1.23) | 0.115 |
| <b>TLC % prior to RSV LRD</b>                                                                                                                                       |                  |       |                  |       |
| ≥80                                                                                                                                                                 | 1.00             |       | 1.00             |       |
| <80                                                                                                                                                                 | 0.94 (0.23-3.88) | 0.933 | 1.29 (0.31-5.36) | 0.73  |
| <b>IVIG</b>                                                                                                                                                         |                  |       |                  |       |
| None                                                                                                                                                                | 1.00             |       | 1.00             |       |
| Weekly                                                                                                                                                              | 0.97 (0.51-1.85) | 0.934 | 0.82 (0.37-1.82) | 0.621 |
| High                                                                                                                                                                | 0.84 (0.41-1.71) | 0.633 | 0.93 (0.42-2.06) | 0.85  |
| Abbreviations: PBSC, peripheral blood stem cell; BM, bone marrow; CB, cord blood; MA, myeloablative; TBI, total body irradiation; IVIG, intravenous immunoglobulin. |                  |       |                  |       |

Supplemental Figure 1: Cohort description

Supplemental Figure 1

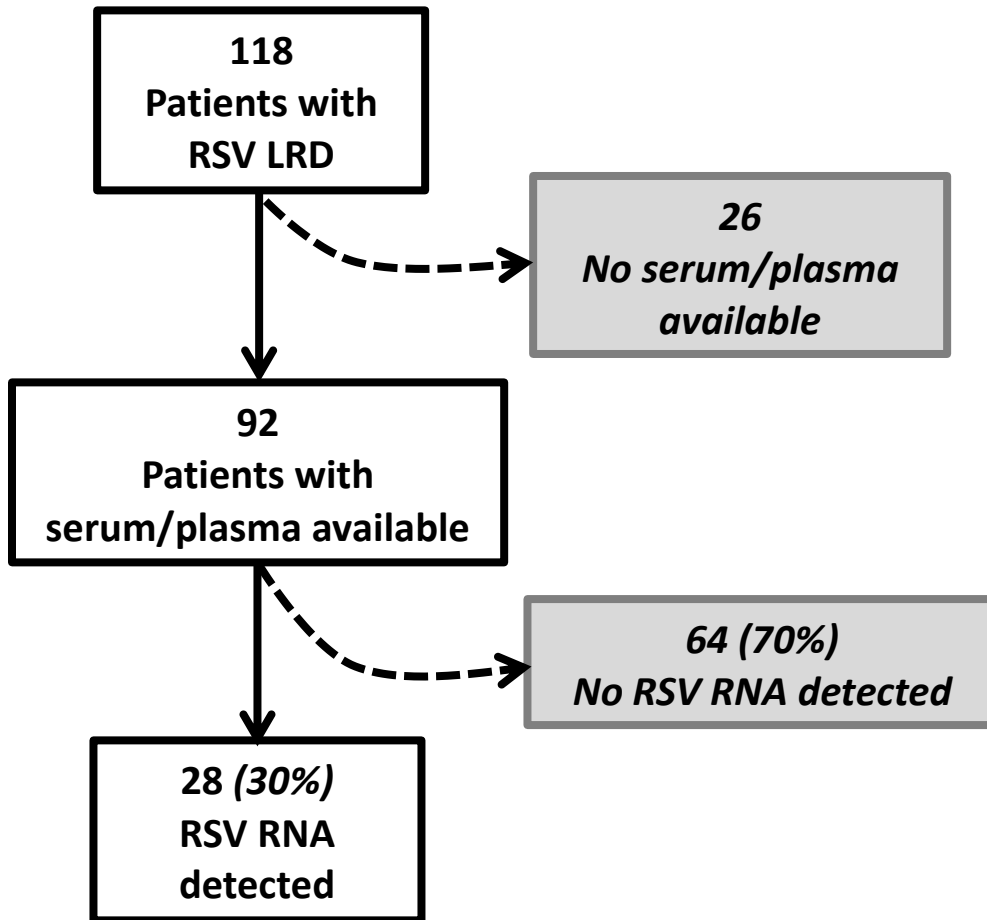

**Supplemental Figure 2: Unadjusted Kaplan-Meier curves for overall survival and cumulative incidence curves for pulmonary death for entire cohort and subgroups at day 90 following RSV LRD.** P-values derived from Cox proportional hazard models. **Supplemental Figure 2A:** Overall survival at day 90 following RSV LRD by ribavirin treatment (N = 118). **Supplemental Figure 2B:** Cumulative incidence of pulmonary death at day 90 following RSV LRD by ribavirin treatment (N= 118). **Supplemental Figure 2C:** Overall survival at day 90 following RSV LRD by oxygen requirement at diagnosis in patients receiving no ribavirin (YES = >2L/Ventilator, NO = None/≤2L) (N = 17). **Supplemental Figure 2D:** Cumulative incidence of pulmonary death at day 90 following RSV LRD by oxygen requirement at diagnosis in patients receiving no ribavirin (N = 17). **Supplemental Figure 2E:** Overall survival at day 90 following RSV LRD by oxygen requirement in patients receiving systemic ribavirin (N = 13). **Supplemental Figure 2F:** Cumulative incidence of pulmonary death at day 90 following RSV LRD by oxygen requirement in patients receiving systemic ribavirin (N = 13).

## Supplemental Figure 2

2A

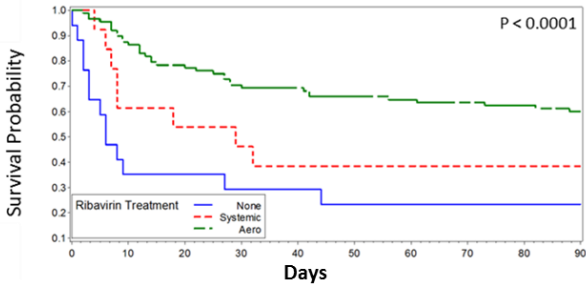

2B

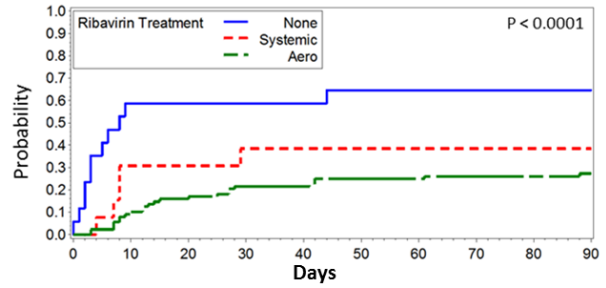

2C

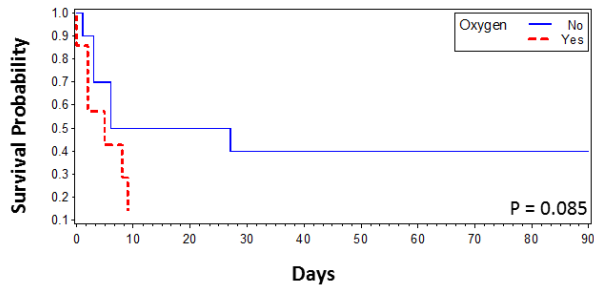

2D

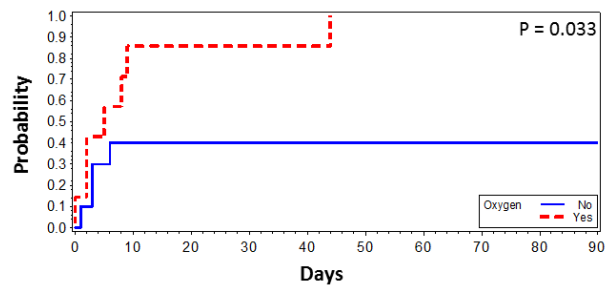

2E

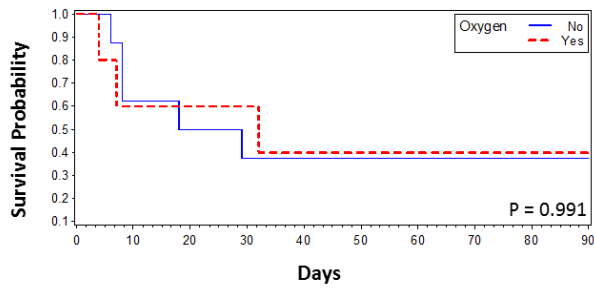

2F

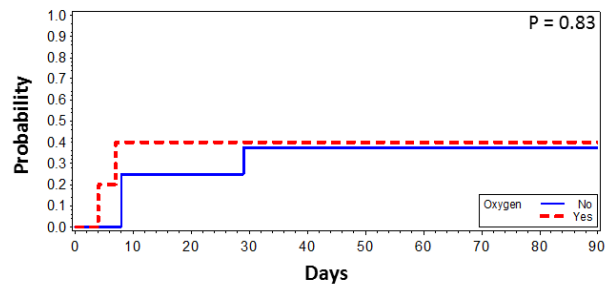

Supplement: supp_cit639_cit639supp.pdf [file supp_cit639_cit639supp.pdf]
